# Supplementary material for: Dellafossite CuAlO2 film growth and conversion to Cu–Al2O3 metal ceramic composite via control of annealing atmospheres
Source: Royal Society of Chemistry journal article supplement (doi:10.1039/c3ce40197a), 2013-01-01
Supplement: c3ce40197a.pdf [file c3ce40197a.pdf]

| Peak Position | CuAlO <sub>2</sub><br>35-1401 | CuAl <sub>2</sub> O <sub>4</sub><br>33-0448 | CuO<br>45-0937         | Cu <sub>4</sub> O <sub>3</sub><br>49-1830 | AlCu<br>26-0016          | Al <sub>2</sub> O <sub>3</sub><br>46-1212 | Al(OH) <sub>3</sub><br>20-0011 | AlOOH<br>21-1307      | Cu <sub>2</sub> O<br>05-0667 |
|---------------|-------------------------------|---------------------------------------------|------------------------|-------------------------------------------|--------------------------|-------------------------------------------|--------------------------------|-----------------------|------------------------------|
| 32.81         |                               |                                             | 32.497 (-110)<br>RI: 8 |                                           |                          |                                           |                                |                       |                              |
| 36.28         | 36.690 (101)<br>RI: 47        | 36.868 (311)<br>RI: 100                     |                        | 36.343 (004)<br>RI: 16                    |                          |                                           | 36.963 (-210)<br>RI: 2         |                       | 36.419 (111)<br>RI: 100      |
| 37.62         | 37.851 (012)<br>RI: 100       |                                             |                        |                                           |                          | 37.777 (110)<br>RI: 21                    |                                |                       |                              |
| 44.00         |                               | 44.856 (400)<br>RI: 16                      |                        | 44.324 (213)<br>RI: 1                     | 44.187 (020)<br>RI: 80   |                                           |                                |                       |                              |
| 44.70         |                               | 44.856 (400)<br>RI: 16                      |                        | 44.324 (213)<br>RI: 1                     | 44.670 (-511)<br>RI: 100 |                                           |                                |                       |                              |
| 51.39         |                               |                                             | 51.381(112)<br>RI: 1   |                                           |                          |                                           | 51.753 (231)<br>RI: 2          | 51.596 (220)<br>RI: 6 |                              |
| 59.34         |                               | 59.422 (511)<br>RI: 25                      |                        |                                           |                          | 59.740 (211)<br>RI: 1                     | 59.430 ( 241)<br>RI: 8         |                       |                              |

Table S1: Impurity Peak positions of CuO coated Al<sub>2</sub>O<sub>3</sub> post annealing at 1100°C corresponding to the sample shown in figure 4c (i) and possible PDF card matches (RI = peak relative intensity)

| Peak Position | CuAlO <sub>2</sub><br>35-1401 | CuAl <sub>2</sub> O <sub>4</sub><br>33-0448 | CuO<br>45-0937                     | Cu <sub>4</sub> O <sub>3</sub><br>49-1830        | AlCu<br>26-0016             | α-Al <sub>2</sub> O <sub>3</sub><br>46-1212 | Al(OH) <sub>3</sub><br>20-0011                         | AlOOH<br>21-1307          | Cu <sub>2</sub> O<br>05-0667 | α-Al <sub>2</sub> O <sub>3</sub><br>50-1496 | δ-Al <sub>2</sub> O <sub>3</sub><br>47-1292 | K-Al <sub>2</sub> O <sub>3</sub><br>52-0803    | γ-Al <sub>2</sub> O <sub>3</sub><br>50-0741 |
|---------------|-------------------------------|---------------------------------------------|------------------------------------|--------------------------------------------------|-----------------------------|---------------------------------------------|--------------------------------------------------------|---------------------------|------------------------------|---------------------------------------------|---------------------------------------------|------------------------------------------------|---------------------------------------------|
| 19.5          |                               |                                             |                                    |                                                  |                             |                                             |                                                        |                           |                              | 19.625<br>(110)<br>RI: 54                   | 19.331<br>(111)<br>RI: 56                   | 19.848<br>(002)<br>RI: 11                      | 19.348<br>(111)<br>RI: 50                   |
| 31.6          |                               |                                             |                                    |                                                  |                             |                                             |                                                        |                           |                              | 31.635<br>(21-2)<br>RI: 4                   | 31.820<br>(220)<br>RI: 93                   | 31.833<br>(013)<br>RI: 75                      | 31.855<br>(220)<br>RI: 75                   |
| 32.79         |                               |                                             | 32.497<br>(-110)<br>RI: 8          |                                                  |                             |                                             |                                                        |                           |                              |                                             |                                             |                                                |                                             |
| 35.70         |                               |                                             | 35.496 (002),<br>(-111)<br>RI: 100 | 35.641 (211)<br>RI: 1<br>35.788 (202)<br>RI: 100 | 35.094<br>(-312)<br>RI: 45  |                                             | 35.744<br>(130)<br>RI: 2                               |                           |                              |                                             |                                             |                                                |                                             |
| 36.84         | 36.690<br>(101)<br>RI: 47     | 36.868<br>(311)<br>RI: 100                  |                                    | 36.343<br>(004)<br>RI: 16                        |                             |                                             | 36.963<br>(-210)<br>RI: 2                              |                           | 36.419 (111)<br>RI: 100      |                                             |                                             |                                                |                                             |
| 37.74         | 37.851<br>(012)<br>RI: 100    |                                             |                                    |                                                  |                             | 37.777<br>(110)<br>RI: 21                   |                                                        |                           |                              | 37.690<br>(121)<br>RI: 74                   | 37.507<br>(311)<br>RI: 100                  |                                                | 37.539<br>(311)<br>RI: 90                   |
| 44.80         |                               | 44.856<br>(400)<br>RI: 16                   |                                    | 44.324<br>(213)<br>RI: 1                         | 44.670<br>(-511)<br>RI: 100 |                                             |                                                        |                           |                              |                                             |                                             |                                                |                                             |
| 45.40         |                               |                                             |                                    |                                                  | 45.068<br>(-313)<br>RI: 100 |                                             | 45.716<br>(-221)<br>RI: 4<br>45.474<br>(-140)<br>RI: 2 | 45.790<br>(131)<br>RI: 6  |                              |                                             | 45.619 (400)<br>RI: 3                       |                                                | 45.668<br>(400)<br>RI: 100                  |
| 49.50         |                               |                                             |                                    |                                                  |                             |                                             | 49.642 (141)<br>RI: 2<br>49.903 (032)<br>RI: 2         | 49.212<br>(200)<br>RI: 25 |                              |                                             | 49.991(331)<br>RI: 7                        | 49.716 (213)<br>RI: 5<br>49.954 (124)<br>RI: 5 |                                             |
| 51.40         |                               |                                             | 51.381<br>(112)<br>RI: 1           |                                                  |                             |                                             | 51.753<br>(231)<br>RI: 2                               | 51.596<br>(220)<br>RI: 6  |                              |                                             |                                             |                                                |                                             |
| 59.10         |                               | 59.422 (511)<br>RI: 25                      |                                    |                                                  |                             | 59.740 (211)<br>RI: 1                       | 59.430 ( 241)<br>RI: 8                                 |                           |                              |                                             |                                             |                                                |                                             |

Table S2: Impurity Peak positions of CuAlO<sub>2</sub> coated Al<sub>2</sub>O<sub>3</sub> post annealing at 1100°C corresponding to the sample shown in figure 4c (ii) and possible PDF card matches. (RI = peak relative intensity)
